# Supplementary material
Source: publisher site journal article supplement (https://www.dovepress.com/article/233694)
Supplement: Supplementary file 1 [file get_supplementary_file.php]

Supplementary Figure 1: Antimicrobial-resistance profile of the MDR isolates.
